# Supplementary material for: Synthesis of hybrid anticancer agents based on kinase and histone deacetylase inhibitors
Source: Royal Society of Chemistry journal article supplement (doi:10.1039/c4md00211c), 2014-01-01
Supplement: c4md00211c1.xlsx [file c4md00211c1.xlsx]

## Sheet: Sheet1
Data from Reaction Biology
ISC/HP= labbook codes.
Compounds were tested in 10-dose IC50 mode with 3-fold serial dilution starting at 10 µM									Compound IC50* (nM):
Control Compound Staurosporine was tested in 10-dose IC50 mode with 3-fold serial dilution starting at 20 μM								Kinase:	13, isc176/1	13, isc176/1	14, isc180/1	14, isc180/1	Staurosporine
Reactions were carried out at 10 µM ATP								FLT1/VEGFR1	1157	ND			6.946
								KDR/VEGFR2	44.88	31.61	>100000		7.217
Data pages include raw data, % Enzyme activity (relative to DMSO controls) , and curve fits.								PDGFRa	11.69	11.99	234.2	256.1	1.313
								PDGFRb	7.977	8.032	1350		1.345
Enzyme Activity Summary
% Enzyme Activity (relative to DMSO controls)											ND-no appreciable activity in first screen
Compounds were tested in 10-dose IC50 mode with 3-fold serial dilution starting at 10 or 100 μM
Control Compound was tested in 10-dose IC50 mode with 3-fold serial dilution starting at 20 μM
Reactions were carried out at 10 μM ATP									Compound IC50* (nM):
								Kinase:	7	ISC2-057-1, 6	3b, ISC-OHP		Staurosporine
Data pages include raw data, % Enzyme activity (relative to DMSO controls) , and curve fits.								FLT1/VEGFR1	ND		117	114	9.07
								KDR/VEGFR2	2406		423	388	12.3
IC50 Summary:								PDGFRa	ND	1187	406.4		<1.0
								PDGFRb	ND		637.1		1.35
								10-point assay
			Compound	Staurosporine							Cpd 6
			IC50* (nM):						Compound IC50* (M)
		Kinase:	8, ISC 2-059-1		IC50 (nM)			Kinases	ISC2-057-1	ISC2-057-1	Staurosporine
		FLT1/VEGFR1	227.8	182.7	4.67			FLT1/VEGFR1	3.639e-07	3.65e-07	1.529e-08
		KDR/VEGFR2	256.8	323.7	6.17			KDR/VEGFR2	2.316e-07	2.415e-07	1.327e-08
		PDGFRa	1496	ND	1.19			PDGFRb	1.935e-07	1.758e-07	2.885e-09
		PDGFRb	518.4	ND	1.44			Control Compound Staurosporine was tested in 10-dose IC50 mode with 10-fold serial dilution starting at 20 μM
								Reactions were carried out at 10 μM ATP
								Data pages include raw data, % Enzyme activity (relative to DMSO controls) , and curve fits.
									Enzyme Activity Summary
									both inactive:
									ISC 2-113-1		ISC 2-114-1		Staurosporine IC50 (nM)
								Kinase:	Data 1	Data 2	Data 1	Data 2
								FLT1/VEGFR1	45.76	44.71	12.03	12.73	2.51
								KDR/VEGFR2	40.4	39.86	6.36	7.9	2.6
								PDGFRa	26.62	26.19	12.55	10.3	<1.0
								PDGFRb	29.84	30.3	13.94	13.63	<1.0
									cpd 9		cpd 10
																	Compounds were tested in single dose duplicate mode at a concentration of 10 μM
																	Control Compound Staurosporine was tested in 10-dose IC50 mode with 10-fold serial dilution starting at 20 μM
																	Reactions were carried out at 10 μM ATP
																	Data pages include raw data, % Enzyme activity (relative to DMSO controls) , and curve fits.
HDAC assays
																	Enzyme Activity Summary
	SAHA		13		6		8		9		10
	EC50 (M)	SD	EC50 (M)	SD	EC50 (M)	SD	EC50 (M)	SD	EC50 (M)	SD	EC50 (M)	SD
HDAC1	2.23717e-08	2.94647e-09			6.8678e-12	1.13496e-11	9.36545e-09	1.2861e-09	1.26215e-06	1.67361e-07	3.72623e-07	3.50408e-08
HDAC2	5.59929e-08	3.18475e-09	7.32178e-05	4.94413e-05	1.11246e-09	4.31095e-11	2.04372e-08	2.75774e-09	3.29197e-06	4.44517e-07	2.22996e-06	3.26438e-07						% Enzyme Activity (relative to DMSO controls)						Staurosporine IC50 (nM)
HDAC3	1.91359e-08	7.07198e-10	0.00357052	0.0067103	6.68894e-10	4.50981e-11	9.77087e-09	1.05851e-09	2.41655e-07	9.69085e-09	3.93732e-07	2.61487e-08
HDAC4	8.7702e-05	3.69399e-05	0.00467049	0.0191983	9.16909e-06	4.23974e-06	0.000115232	0.000152293	0.00295758	0.00764399	0.00362717	0.00905522								9, ISC 2-113-1		10, ISC 2-114-1
HDAC5	2.06482e-05	2.25283e-06	0.000503861	0.000345553	8.49941e-07	1.76021e-07	2.9393e-05	1.04841e-05	0.000640702	0.000671969	0.000246128	0.000206071					Kinase:			Data 1	Data 2	Data 1	Data 2
HDAC6	2.70623e-09	1.34785e-10	0.000105975	5.26278e-05	3.22955e-10	5.53313e-11	1.60689e-09	1.58699e-10	0.000421083	0.00158671	4.61308e-06	5.75149e-07					FLT1/VEGFR1			45.76	44.71	12.03	12.73	2.51
HDAC7	5.18063e-05	8.74338e-06	0.000531839	0.000573766	6.67343e-06	2.28291e-06	2.35675e-05	8.30718e-06	0.000466117	0.000549379	0.000379155	0.000428088					KDR/VEGFR2			40.4	39.86	6.36	7.9	2.6
HDAC8	1.02157e-06	6.47611e-08	0.000436783	0.000600276	6.02126e-08	1.04719e-08	3.11836e-07	5.28369e-08	0.000221439	0.000337889	4.67786e-12	8.2477e-11					PDGFRa			26.62	26.19	12.55	10.3	<1.0
HDAC9	7.13949e-05	2.46611e-05	0.00107984	0.00409099	2.22406e-05	1.51496e-05	0.000339377	0.000817125	0.000155427	0.000222771	0.000399903	0.000815821					PDGFRb			29.84	30.3	13.94	13.63	<1.0
